# **Forkhead box O1-mediated ubiquitination suppresses RIG-I-mediated antiviral immune responses via its DNA binding domain**

Wei Liu, Yanlei Yue, Wenwen Zhang, Zhenling Ma, Wen Yao, Tao Li, Jun Xu, Wenqing Li,

Lei Sun, Wenjun Liu, Guoqing Yang

Statement: The authors have withdrawn our manuscript whilst we perform additional experiments to test some of our conclusions further. Therefore, the authors do not wish this work to be cited as reference for the project. If you have any questions, please contact the corresponding author.
